# Supplementary material
Source: Springer Nature journal article supplement (https://www.springermedizin.de/resource/supplementary/13045_2013_366_MOESM1_ESM.pdf/9661264)

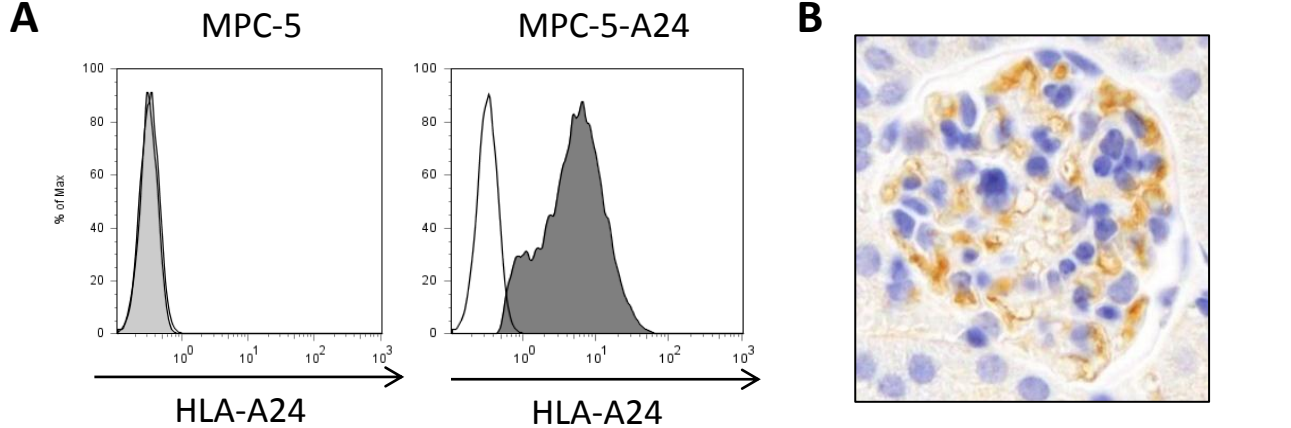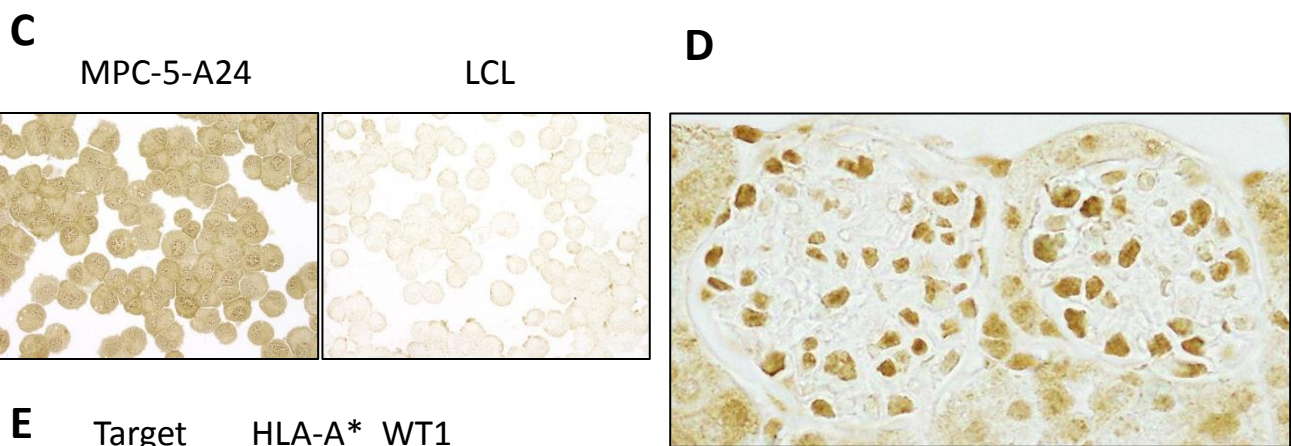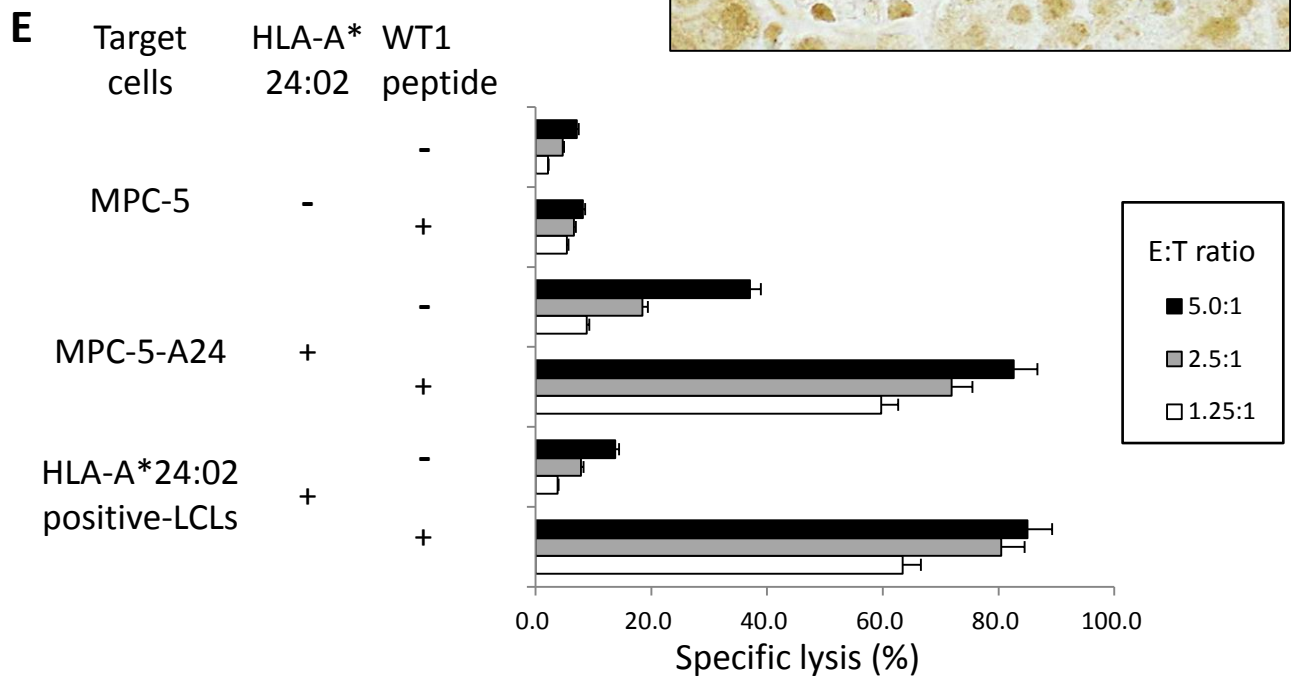

Supplement: MOESM1 [file 9661264]
